# Supplementary material for: Material-specific three-dimensional printing of electrostatic chuck components via digital light processing: Integration of Al2O3 and BaTiO3 as dual materials for performance optimization
Source: Research Square preprint supplement (doi:10.21203/rs.3.rs-7645102/v1), 2025-11-11
Supplement: Supplementary file 1 [file 9711424fb4d81afa854259ca.docx]

**Title**

Material-specific three-dimensional printing of electrostatic chuck components via digital light processing: Integration of Al2O3 and BaTiO3 as dual materials for performance optimization

**Author Information**

Yujin Kim1, Jae-Hyuk Park2,3, Jongwoo Lim2,3,*, Sukeun Yoon 1,*, Jihoon Kim 1,4,*

1 *Division of Advanced Materials Engineering, Kongju National University, Cheonan, 32588, Republic of Korea*

2 *School of Advanced Materials Science & Engineering, Sungkyunkwan University, Suwon, 16419, Republic of Korea*

3 *Electro Static Technology, Inc., Osan, 18102, Republic of Korea*

4 *Regional Industrial Application Lab, Kongju National University, Cheonan, 32588, Republic of Korea*

*Corresponding author: jwlim80@skku.edu (J. Lim), skyoon@kongju.ac.kr (S. Yoon), Jihoon.kim@kongju.ac.kr (J. Kim)

**Description**

- *Mechanical analysis of Al2O3- and BaTiO3-resin dielectric layers: tensile properties, and force tolerance (****Section S1-2****)*
- *Surface profilometry-based air gap determination using 3D and 2D roughness measurements of the Al2O3-coated ESC (****Section S3-S4****)*
- *Surface profilometry-based air gap determination using 3D and 2D roughness measurements of the BaTiO3-coated ESC (****Section S5-S6****)*
- *FEA-based chucking force simulations with varying dielectric layer thickness and material compositions (****Section S7****)*

***Section S1.*** *Tensile stress-strain behavior of Al2O3- and BaTiO3-resin composites with varying ceramic contents.*


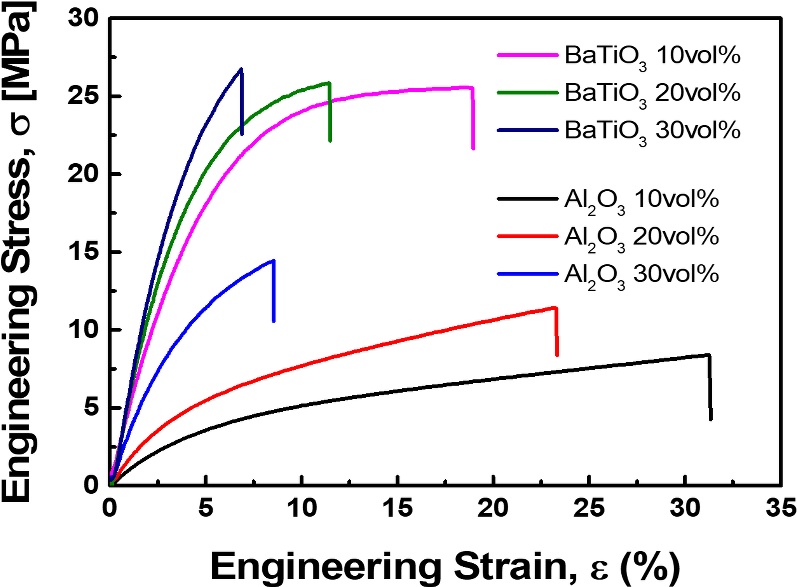


Figure S1. Tensile stress–strain curves of Al₂O₃- and BaTiO₃-resin composites with varying ceramic contents (10, 20, and 30 vol%), used to assess the mechanical performance of the dielectric layer materials.

***Section S2.*** *Maximum tolerable forces calculated from ultimate tensile strength (UTS) values of Al2O3- and BaTiO3-resin composites.*

|  |  | Thickness = 70um | Thickness = 200um |
| --- | --- | --- | --- |
| Al2O3 10vol% | 8.40 MPa | 0.588 N | **1.680 N** |
| Al2O3 20vol% | 11.41 MPa | 0.799 N | **2.282 N** |
| Al2O3 30vol% | 14.45 MPa | 1.012 N | **2.890 N** |
| BaTiO3 10vol% | 25.55 MPa | **1.789 N** | - |
| BaTiO3 20vol% | 25.84 MPa | **1.809 N** | - |
| BaTiO3 30vol% | 26.74 MPa | **1.872 N** | - |

Table S1. Maximum tolerable forces for each Al₂O₃- and BaTiO₃-resin composite, calculated from their UTS values as a function of dielectric layer thickness.

***Section S3.****3D profilometry-based air gap determination using surface roughness of the Al2O3-coated ESC.*


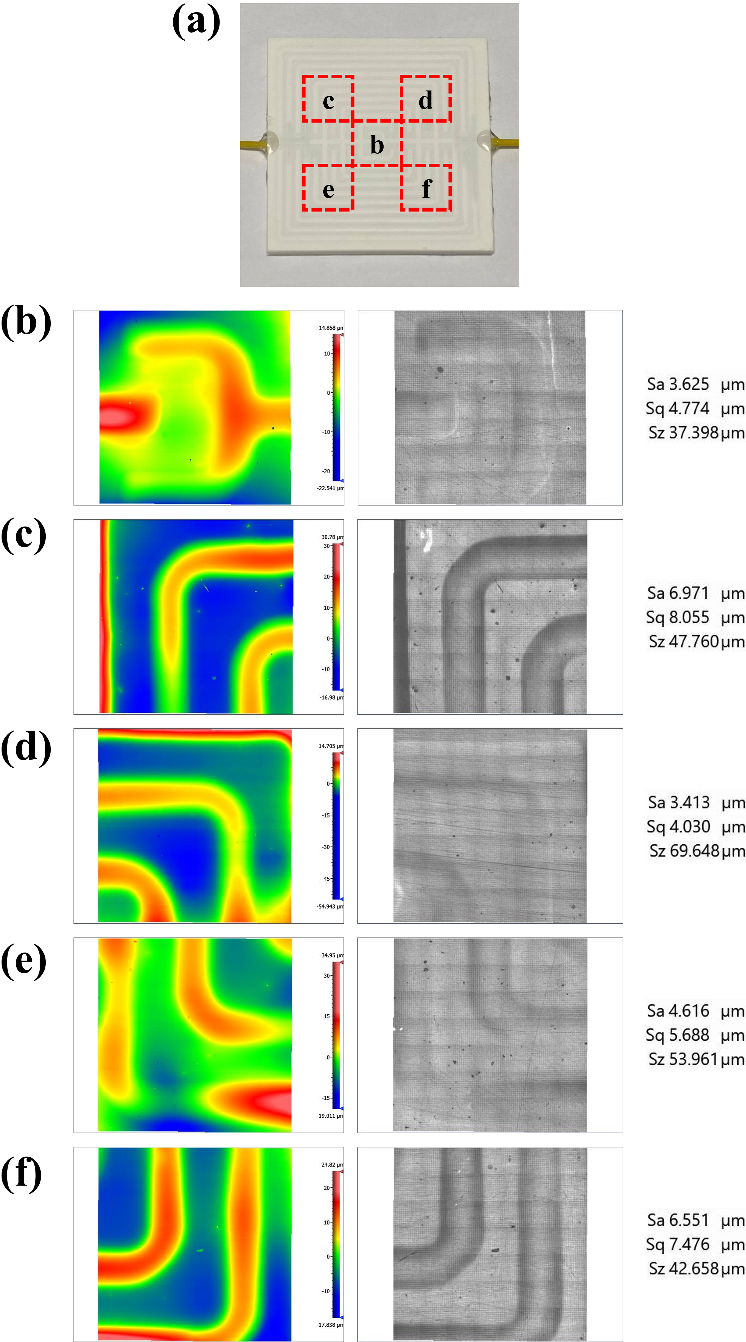


Figure S2. 3D surface profiler measurement of the Al2O3-coated ESC (a) measurement areas (5×5mm2) on the ESC surface and (b-f) surface profile results with a total average roughness of 5.035 m.

***Section S4.*** *2D profilometry-based air gap determination using surface roughness of the Al2O3-coated ESC.*


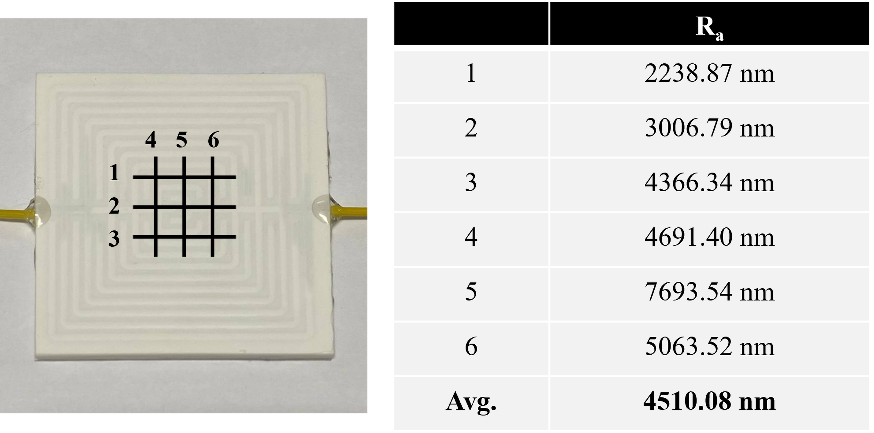


Figure S3. 2D surface profile of the Al2O3-coated ESC, indicating a total average roughness of 4510.08 nm.

***Section S5.*** *3D profilometry-based air gap determination using surface roughness of the BaTiO3-coated ESC.*


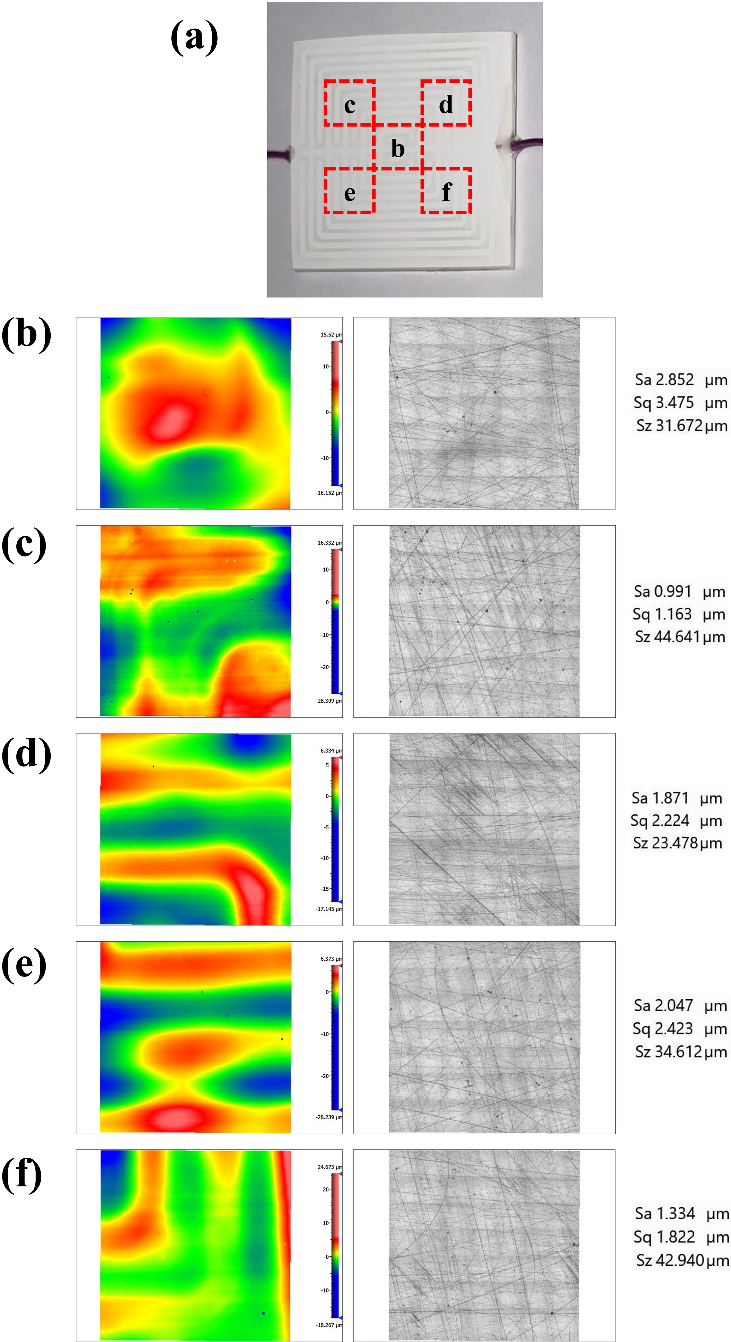


Figure S4. 3D surface profiler measurement of the BaTiO3-coated ESC (a) measurement areas (5×5mm2) on the ESC surface and (b-f) surface profile results with a total average roughness of 1.819 m.

***Section S6.*** *2D profilometry-based air gap determination using surface roughness of the BaTiO3-coated ESC.*


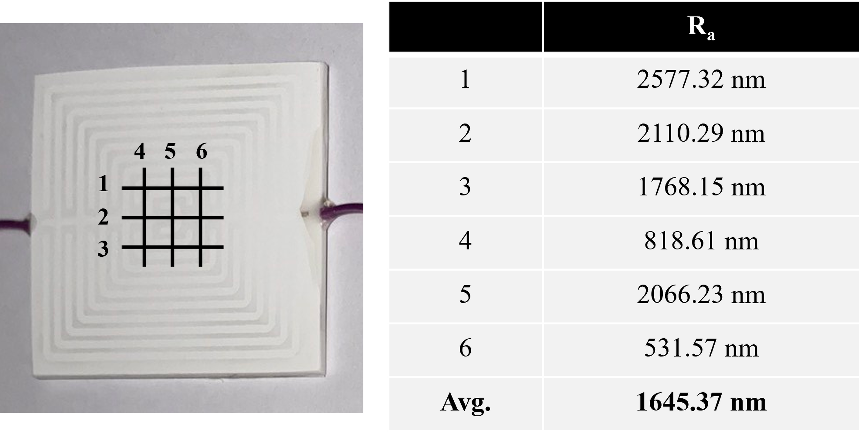


Figure S5. 2D surface profile of the BaTiO3-coated ESC, indicating a total average roughness of 1645.37 nm.

***Section 7.*** *FEA-based chucking force simulations with varying dielectric layer thickness and material compositions.*


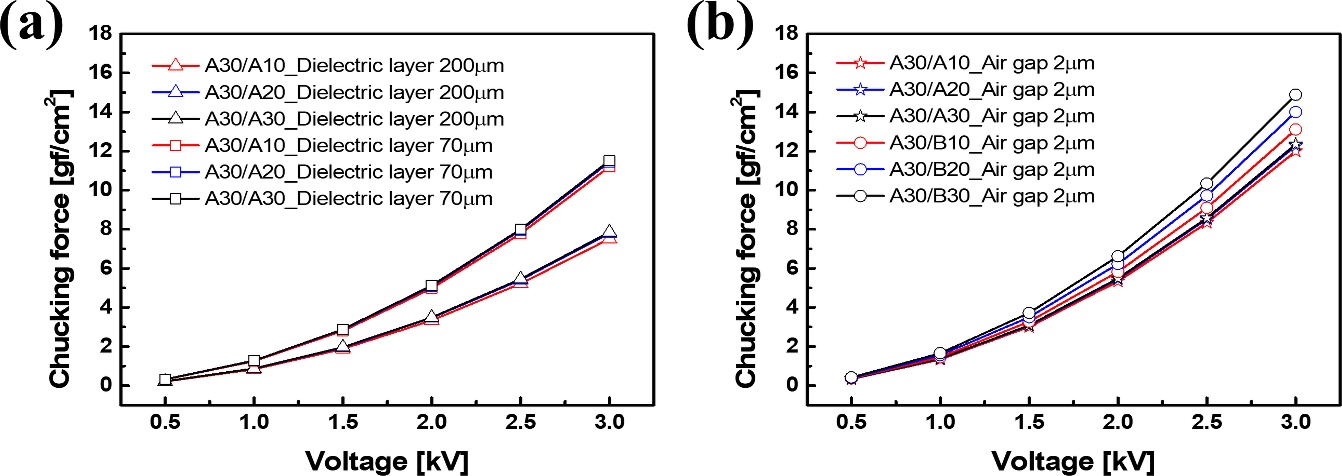


Figure S6. Simulated chucking force as a function of applied voltage. (a) Comparison of dielectric-layer thicknesses (70 m vs. 200 m) using Al₂O₃-resin composites. (b) Comparison between Al₂O₃- and BaTiO₃-resin based dielectric layers with the same thickness (70 m) and air gap (2 m).
